# Supplementary material for: Effect of Thiouronium-Based Ionic Liquids on the Formation and Growth of CO2 (sI) and THF (sII) Hydrates
Source: MDPI journal article supplement (doi:10.3390/ijms23063292), 2022-03-18
Supplement: s1 [file s1]

## Supporting Information

# Effect of Thiouronium-based Ionic Liquids on the Formation and Growth of CO<sub>2</sub> (sI) and THF (sII) Hydrates

Mário R. C. Soromenho, Anastasiia Keba, José M. S. S. Esperança,\* Mohammad Tariq\*

LAQV, REQUIMTE, Departamento de Química,  
Faculdade de Ciências e Tecnologia,  
Universidade NOVA de Lisboa, 2829-516 Caparica, Portugal  
E-mails: [jmesp@fct.unl.pt](mailto:jmesp@fct.unl.pt) (JMSSE); [tariq@fct.unl.pt](mailto:tariq@fct.unl.pt) (MT),

**Figure S1.** Comparison of CO<sub>2</sub> hydrates phase equilibria in presence of ~10 wt% ILs reported in the literature [1-5] along with the two thiouronium ionic liquids tested in this work. The dotted line represents the CO<sub>2</sub> hydrates phase equilibria in absence of any additive.

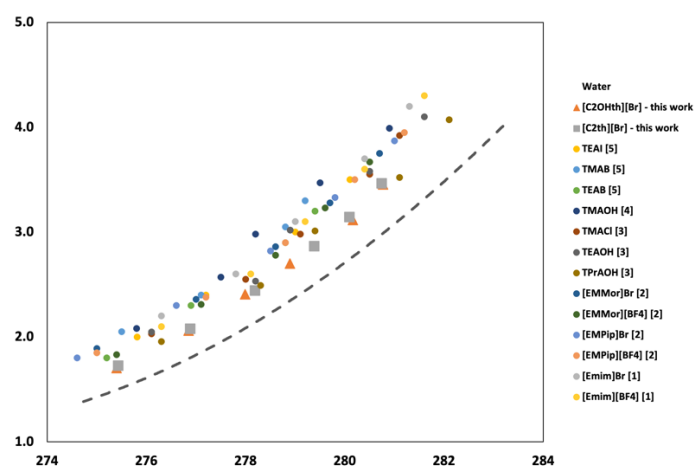

**Figure S2.** Onset nucleation temperatures ( $T_{on}$ ) of CO<sub>2</sub> hydrates in Milli-Q water and in 1 wt% aqueous solution of thiuronium ionic liquids at 30 bar and 36 bar obtained from 12 different experiments (represented at x-axis). The blue dashed lines represent the average  $T_{on}$  values for the system and are reported in Table 2. The error bars represent the standard deviation values of the measurements for respective set of experiment.

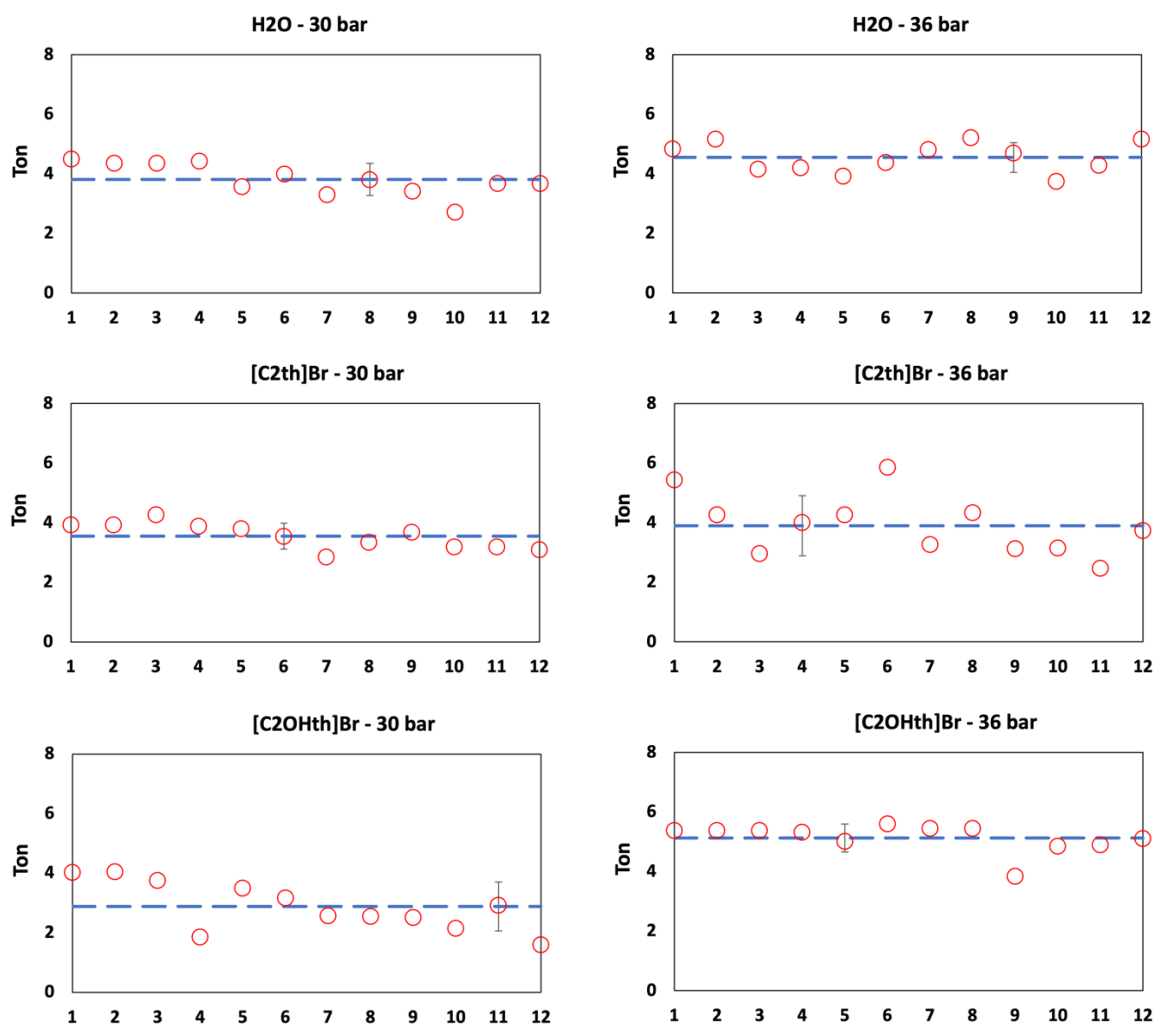

**Table S1.** Results of the twin-tailed t-test of the onset temperature of nucleation ( $T_{on}$ ) and decomposition temperatures ( $T_{od}$ ) values for the studied ( $H_2O+CO_2$ ) and ( $H_2O+CO_2+IL$ ) systems obtained at different pressures.

| Pressure (P/bar)                  | Milli Q water – [C <sub>2</sub> th][Br]                                           | Milli Q water – [C <sub>2</sub> OHth][Br]                                      |
|-----------------------------------|-----------------------------------------------------------------------------------|--------------------------------------------------------------------------------|
| <b><math>T_{on}</math> Values</b> |                                                                                   |                                                                                |
| 30                                | t-value: 1.29871<br>P-value: 0.207493<br>Remarks: result not significant at P<.05 | t-value: 3.26739<br>P-value: 0.003524<br>Remarks: result significant at P<.05  |
| 36                                | t-value: 1.98456<br>P-value: 0.059804<br>Remarks: result not significant at P<.05 | t-value: -2.94431<br>P-value: 0.007501<br>Remarks: result significant at P<.05 |
| <b><math>T_{od}</math> Values</b> |                                                                                   |                                                                                |
| 30                                | t-value: 5.01324<br>P-value: 0.000051<br>Remarks: result significant at P<.05     | t-value: 8.20428<br>P-value: <0.00001<br>Remarks: result significant at P<.05  |
| 36                                | t-value: 2.2334<br>P-value: 0.036013<br>Remarks: result significant at P<.05      | t-value: 2.81639<br>P-value: 0.010054<br>Remarks: result significant at P<.05  |

## References:

- [1] Makino, T.; Matsumoto, Y.; Sugahara, T.; Ohgaki, K.; Masuda, H. Effect of Ionic Liquid on Hydrate Formation Rate in Carbon Dioxide Hydrates. In Proceedings of the 7th International Conference on Gas Hydrates (ICGH); Edinburgh, Scotland, United Kingdom, 2011; pp 2–5.
- [2] Cha, J. H.; Ha, C.; Kang, S. P.; Kang, J. W.; Kim, K. S. Thermodynamic Inhibition of CO<sub>2</sub> Hydrate in the Presence of Morpholinium and Piperidinium Ionic Liquids. *Fluid Phase Equilib.* 2016, 413, 75–79.
- [3] Khan, M. S.; Bavoh, C. B.; Partoon, B.; Lal, B.; Bustam, M. A.; Shariff, A. M. Thermodynamic Effect of Ammonium Based Ionic Liquids on CO<sub>2</sub> Hydrates Phase Boundary. *J. Mol. Liq.* 2017, 238, 533.
- [4] Khan, M. S.; Partoon, B.; Bavoh, C. B.; Lal, B.; Mellon, N. B. Fluid Phase Equilibria Influence of Tetramethylammonium Hydroxide on Methane and Carbon Dioxide Gas Hydrate Phase Equilibrium Conditions. *Fluid Phase Equilib.* 2017, 440, 1–8.
- [5] Qasim, A.; Khan, M. S.; Lal, B.; Shariff, A. M. Phase Equilibrium Measurement and Modeling Approach to Quaternary Ammonium Salts with and without Monoethylene Glycol for Carbon Dioxide Hydrates. *J. Mol. Liq.* 2019, 282, 106–114.
